# Supplementary material for: Mechanistic Study of the Kinetic Phenomena Influencing the Bacteriostatic Action of Silver Ions in Agar Bioassays
Source: MDPI journal article supplement (doi:10.3390/antibiotics10040368), 2021-03-31
Supplement: s1 [file s1]

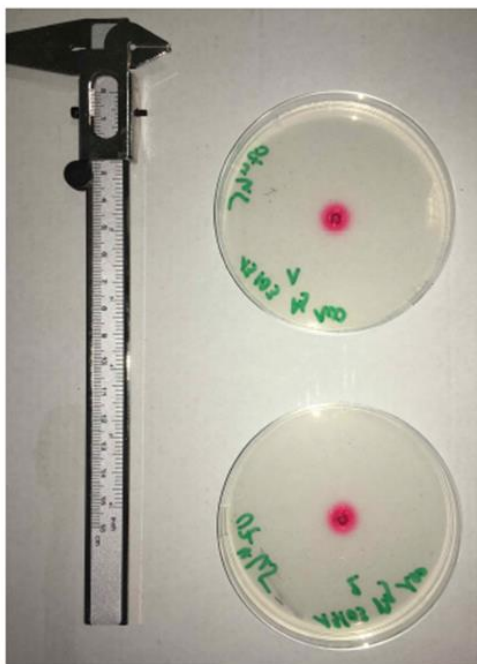

(a)

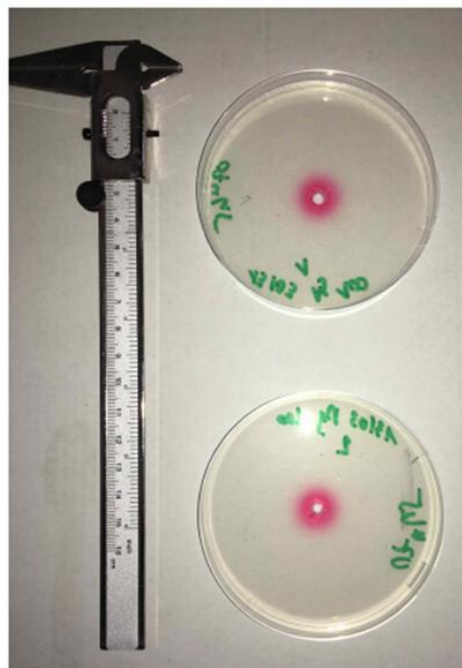

(b)

**Figure S1.** Evolution of dyed halos over time: (a) after 60 min and (b) after 155 min experiment. Each plate was duplicated.

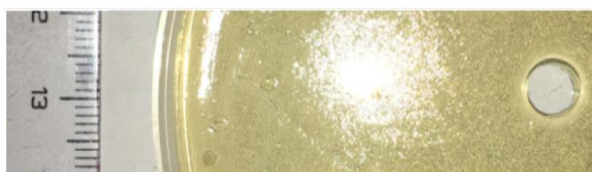

(a)

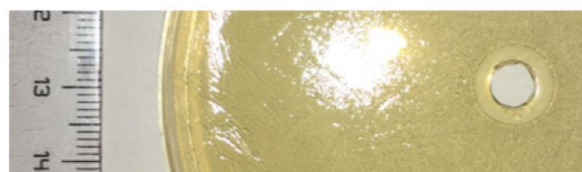

(b)

**Figure S2.** Pictures of inoculated plates in contact with silver ions for 24 h; initial silver concentrations were respectively (a) 20 mg L<sup>-1</sup> and (b) 155 mg L<sup>-1</sup>.
